# Supplementary material for: PDE5 inhibitors enhance the lethality of pemetrexed through inhibition of multiple chaperone proteins and via the actions of cyclic GMP and nitric oxide
Source: PubMed Central journal article supplement (PMC5352068; doi:10.18632/oncotarget.13640), 2016-11-26
Supplement: oncotarget-08-1449-s001.pdf [file oncotarget-08-1449-s001.pdf]

# PDE5 inhibitors enhance the lethality of pemetrexed through inhibition of multiple chaperone proteins and via the actions of cyclic GMP and nitric oxide

## SUPPLEMENTARY FIGURES

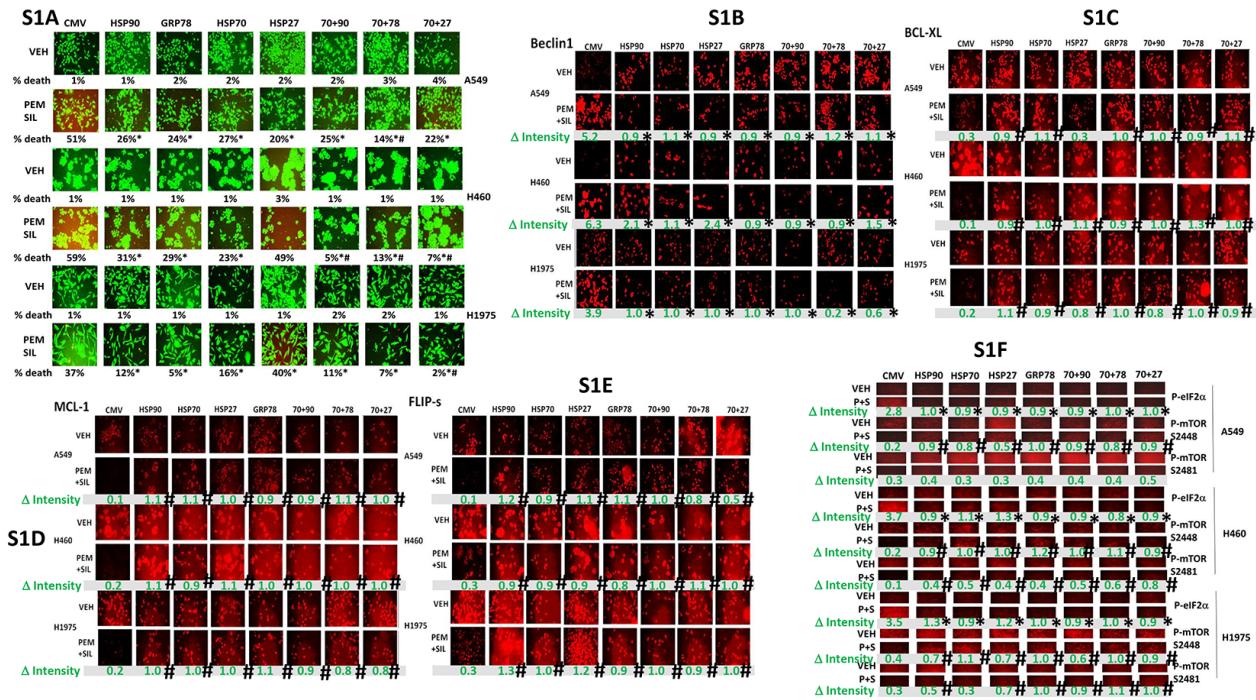

**Supplementary Figure S1: Expression of chaperone proteins prevents down-regulation of MCL-1, BCL-XL and c-FLIP-s by [pemetrexed + sildenafil] exposure.** A. NSCLC cells were transfected with an empty vector plasmid (CMV) or plasmids to express: HSP90; GRP78; HSP70; HSP27, as indicated. Twenty-four h after transfection cells were treated with vehicle control or [pemetrexed (1.0  $\mu$ M) + sildenafil (2  $\mu$ M)] in combination for 24h. Floating cells were cytopun onto the 96 well plate and viability determined using a live / dead viability stain where green cells are viable and yellow / red cells are dead (n = 3 +/- SEM) \* p < 0.05 less than the corresponding value in CMV cells; # p < 0.05 less than corresponding cells transfected to express only one chaperone. B.E. NSCLC cells were transfected with an empty vector plasmid (CMV) or plasmids to express: HSP90; GRP78; HSP70; HSP27, as indicated. Twenty-four h after transfection cells were treated with vehicle control or [pemetrexed (1.0  $\mu$ M) + sildenafil (2  $\mu$ M)] in combination for 6h. Cells were then fixed in place and immuno-fluorescence staining performed to determine the phosphorylation and expression of the indicated proteins. (n = 3 +/- SEM) \* p < 0.05 less than the corresponding value in CMV cells; # p < 0.05 greater than corresponding value in CMV cells. F. NSCLC cells were transfected with an empty vector plasmid (CMV) or plasmids to express: HSP90; GRP78; HSP70; HSP27, as indicated. Twenty-four h after transfection cells were treated with vehicle control or [pemetrexed (1.0  $\mu$ M) + sildenafil (2  $\mu$ M)] in combination for 6h. Cells were then fixed in place and immuno-fluorescence staining performed to determine the phosphorylation of: mTOR S2448 (mTORC1); mTOR S2481 (mTORC2); eIF2 $\alpha$  S51. (n = 3 +/- SEM) \* p < 0.05 less than the corresponding value in CMV cells; # p < 0.05 greater than corresponding value in CMV cells.

S2

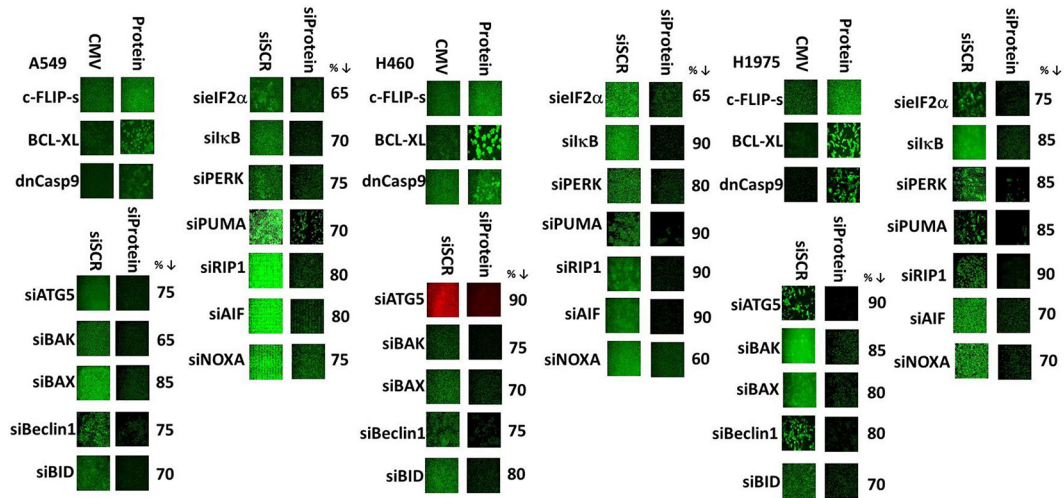

**Supplementary Figure S2: Controls to show knock down and over-expression of various proteins examined in the manuscript.** The percentage decline in protein expression after siRNA exposure is presented alongside the images showing knock down. Values are rounded to the nearest 5%.

S3

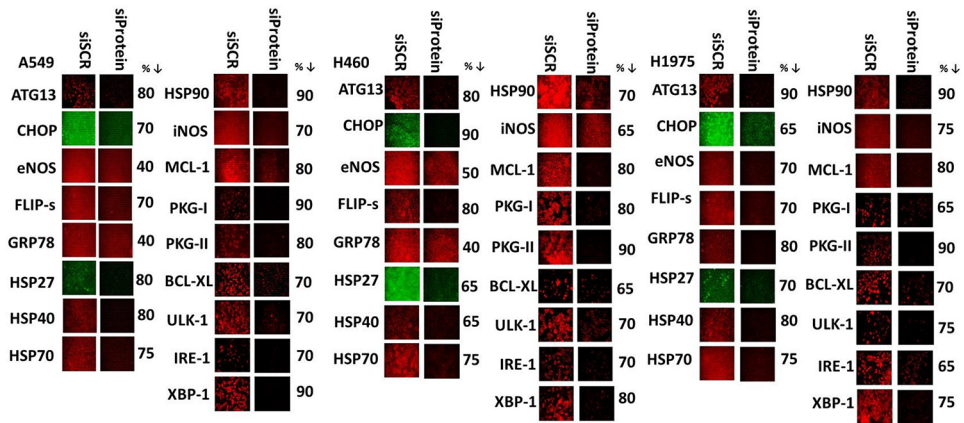

**Supplementary Figure S3: Controls to show knock down of various proteins examined in the manuscript.** The percentage decline in protein expression after siRNA exposure is presented alongside the images showing knock down. Values are rounded to the nearest 5%.
